# Supplementary material for: Accelerometer-Derived Activity Phenotypes in Young Adults: a Latent Class Analysis
Source: Springer Nature journal article supplement (doi:10.1007/s12529-018-9721-4), 2018-04-30
Supplement: MOESM2 [file 15729020]

Appendix Table 2: Correlations between variables (spearman rho)

|  |  | Steps | MVPA | MVPA SD | MVPA Intensity | MVPA  Duration | Sedentary-to-light Ratio | Sedentary-to-light SD |
| --- | --- | --- | --- | --- | --- | --- | --- | --- |
| Women, n=324 | MVPA | .52 |  |  |  |  |  |  |
| MVPA SD | .34 | .73 |  |  |  |  |  |
| MVPA Intensity | .21 | .59 | .56 |  |  |  |  |
| MVPA Duration | .19 | .62 | .60 | .76 |  |  |  |
| Sedentary-to-light Ratio | -.74 | -.16 | -.06 | .07 | .20 |  |  |
| Sedentary-to-light SD | -.30 | -.11 | -.02 | -.04 | -.02 | .37 |  |
| Sedentary Bouts | -.62 | -.11 | .04 | .03 | .19 | .87 | .51 |
| Men, n=304 | MVPA | .60 |  |  |  |  |  |  |
| MVPA SD | .38 | .71 |  |  |  |  |  |
| MVPA Intensity | -.004 | .41 | .40 |  |  |  |  |
| MVPA Duration | -.02 | .48 | .53 | .74 |  |  |  |
| Sedentary-to-light Ratio | -.81 | -.29 | -.15 | .27 | .35 |  |  |
| Sedentary-to-light SD | -.32 | -.10 | .04 | .01 | .10 | .39 |  |
| Sedentary Bouts | -.62 | -.20 | -.05 | .18 | .29 | .85 | .52 |
